# Supplementary material for: The correlation between Arctic sea ice, cloud phase and radiation using A-train satellites
Source: Copernicus journal article supplement (doi:10.5194/egusphere-2023-2940), 2023-12-11
Supplement: Supplementary file 1 [file egusphere-2023-2940-supplement.pdf]

*Supplement of.*

## **The correlation between Arctic sea ice, cloud phase and radiation using A-train satellites**

Grégory V. Cesana<sup>1,2</sup>, Olivia Pierpaoli<sup>3,2</sup>, Matteo Ottaviani<sup>4,2</sup>, Linh Vu<sup>3,2</sup>, and Zhonghai Jin<sup>2</sup>

<sup>1</sup>Center for Climate Systems Research, Columbia University, New York, NY

<sup>2</sup>NASA Goddard Institute for Space Studies, New York, NY

<sup>3</sup>Department of Atmospheric Sciences, University of Washington, Seattle, WA

<sup>4</sup>Terra Research Inc, Hoboken, NJ 07030

**Correspondence:** Grégory V. Cesana (gregory.cesana@columbia.edu)

**Table S1.** Mean ratio (%) of mixed-phase to liquid plus mixed-phase clouds for each dataset. Datasets are subset to 2007-2010.

| (%)              | DARDAR | PHACT | CERES |
|------------------|--------|-------|-------|
| mix/(liquid+mix) | 49     | 26    | N/A   |

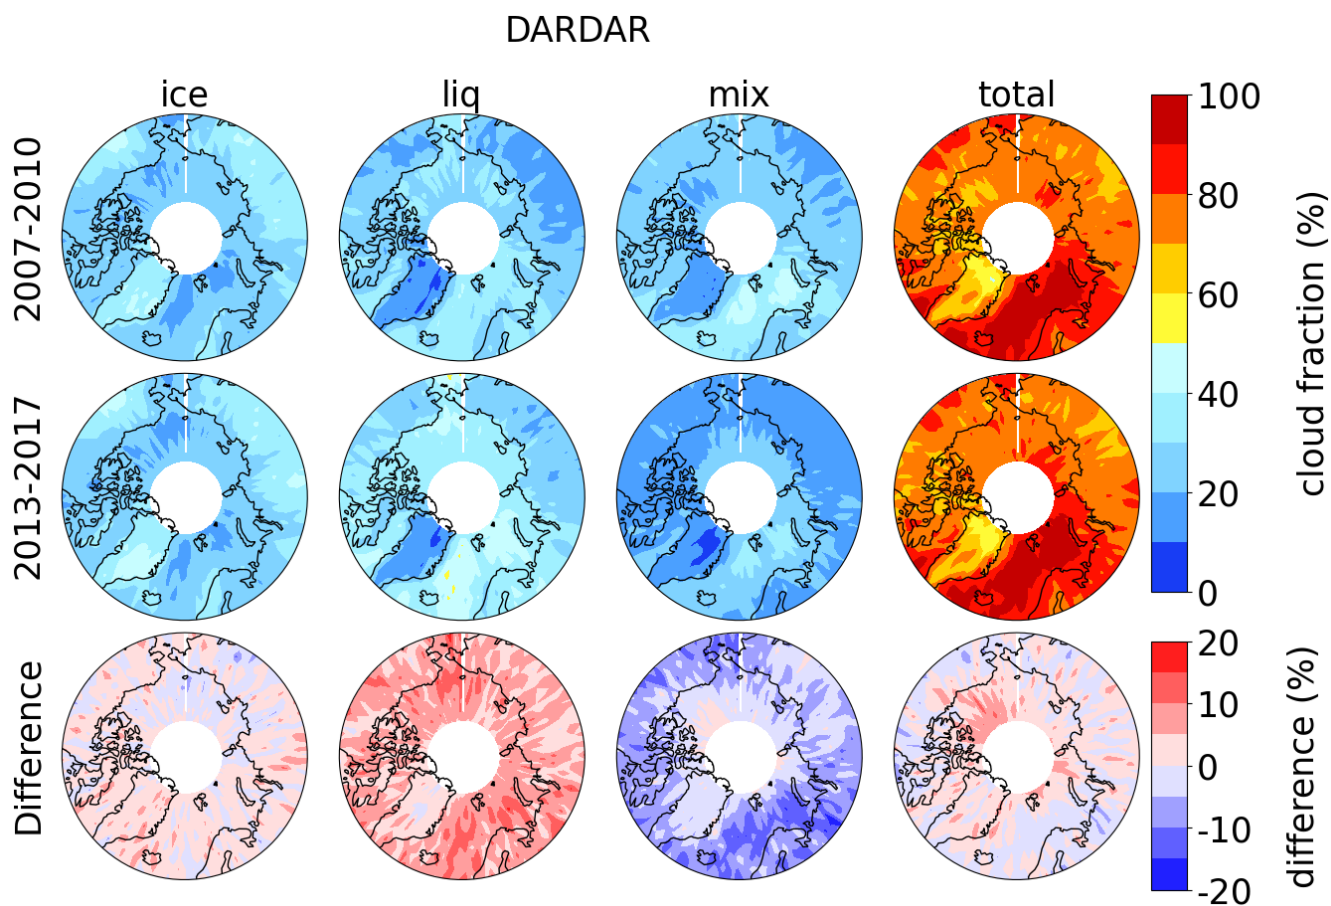

**Figure S1.** DARDAR cloud cover differences (bottom row) between daytime observing period (2013-2017; middle row) and daytime and nighttime observing period (2007-2010; top row).

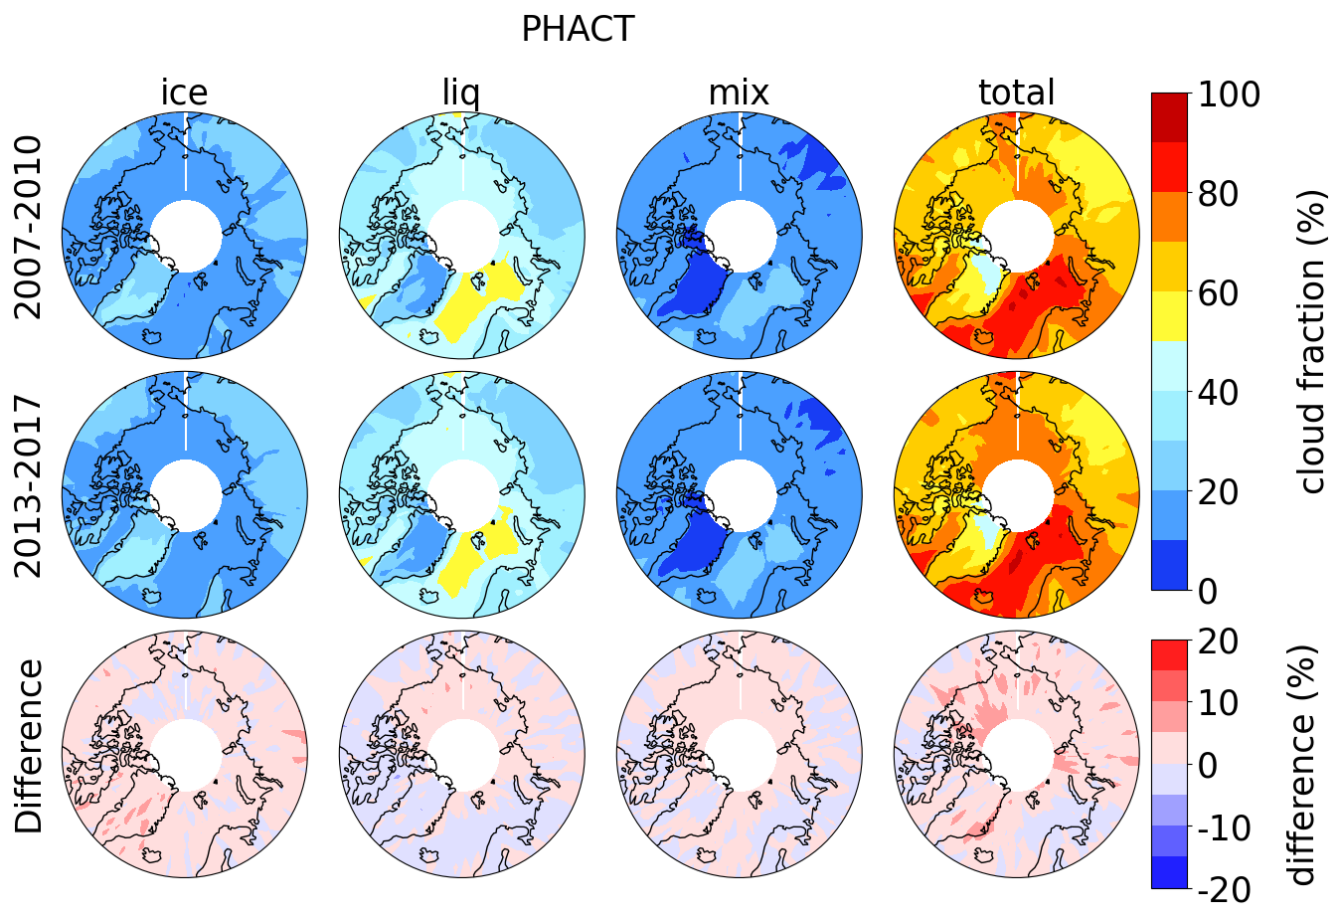

**Figure S2.** Same as Fig. S1 for PHACT, except that daytime and nighttime data are used in both time periods.

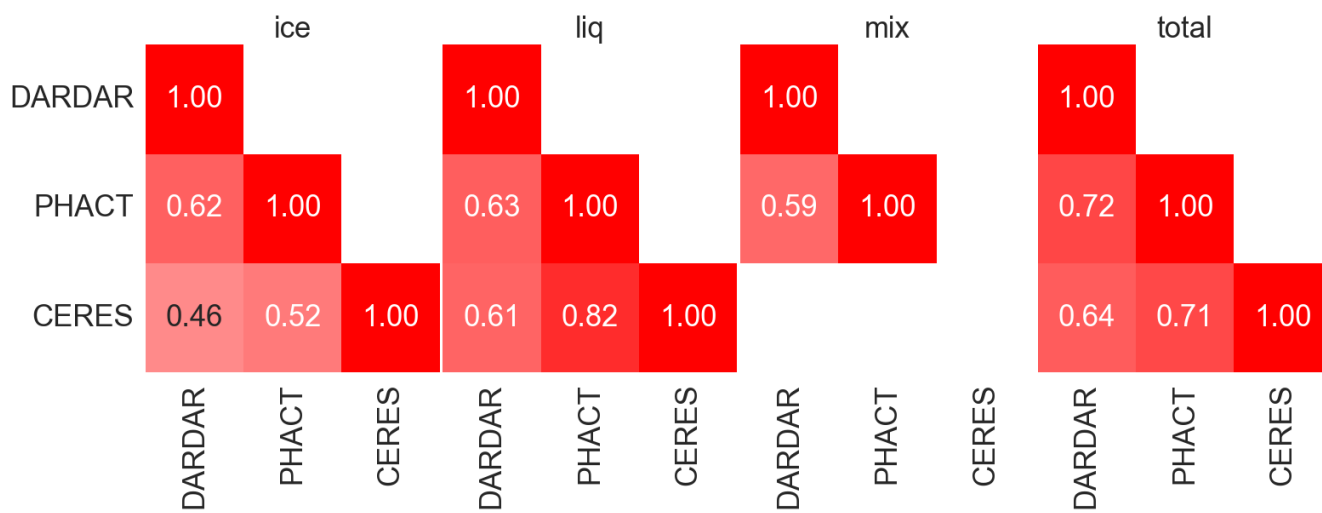

**Figure S3.** Pattern correlation between datasets for the different cloud covers (subset to 2007-2010).

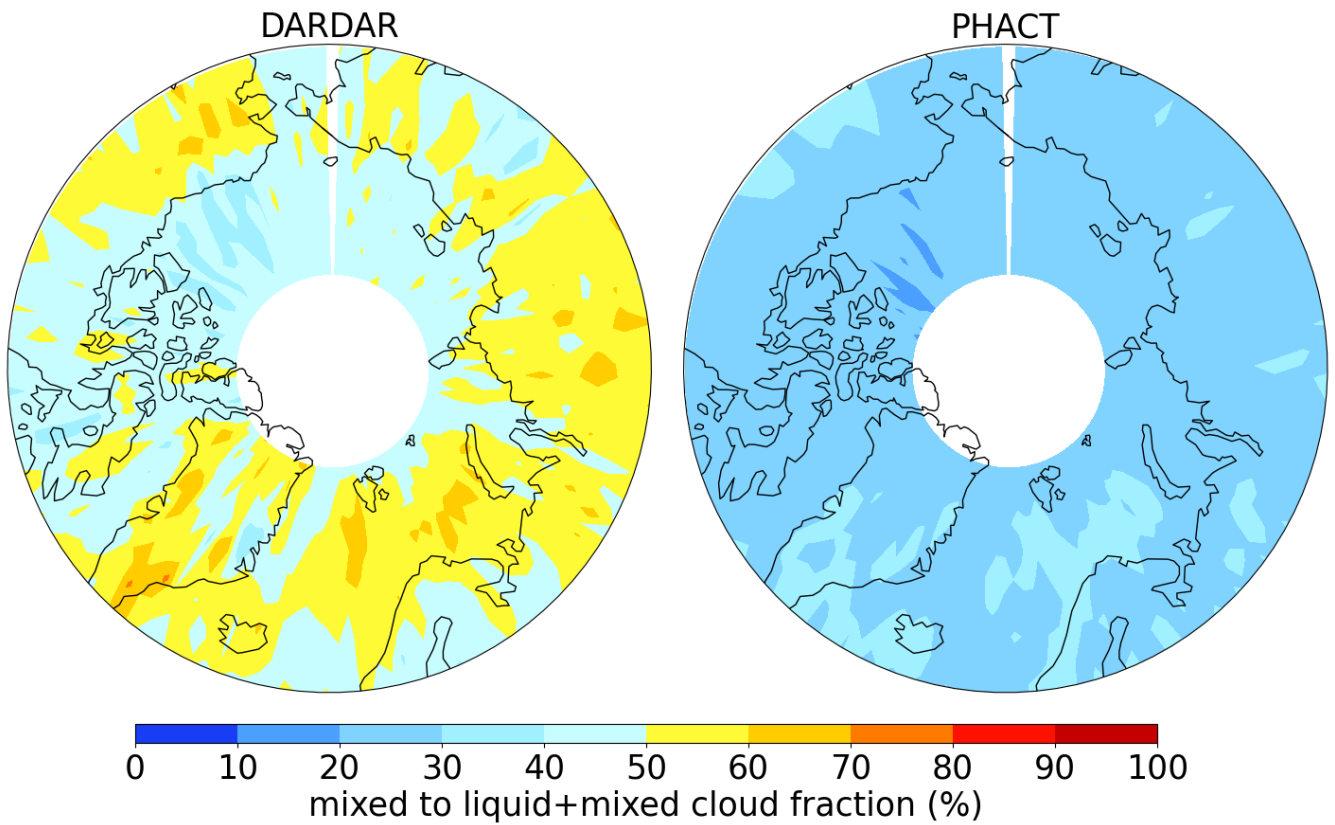

**Figure S4.** Ratio (%) of mixed-phase to liquid plus mixed-phase clouds for DARDAR (left) and PHACT (right). Datasets are subset to 2007-2010.
